# Supplementary material for: Correlated Evolution of Positions within Mammalian cis Elements
Source: PubMed Central journal article supplement (PMC3568137; doi:10.1371/journal.pone.0055521), 2013-02-08
Supplement: pone.0055521.s001.pdf [file pone.0055521.s001.pdf]

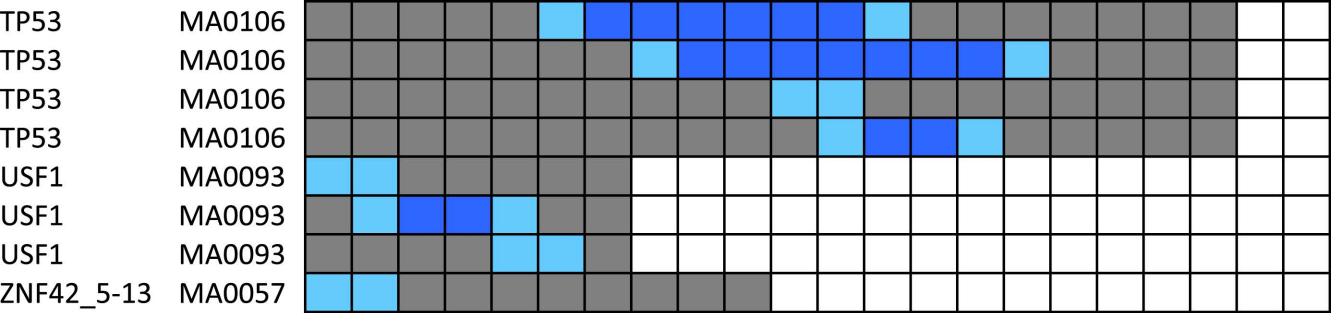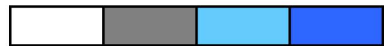

NA

No Link

End Point

Link
